# Supplementary material
Source: MDPI journal article supplement (https://www.mdpi.com/2073-4360/14/6/1245)
Supplement: s1 [file s1]

Archive with 1 entries (1 files):
- Simoncic_Supplementary_Material_Polymers-1629148.pdf
